# Supplementary material for: Whole-Genome Sequencing and Intraspecific Analysis of the Yeast Species Lachancea quebecensis
Source: PubMed Central journal article supplement — Genome Biol Evol. 2016 Jan 5;8(3):733–41. doi: 10.1093/gbe/evv262 (PMC4823976; doi:10.1093/gbe/evv262), 2016-01-05

## Figure S1.

Electrophoretic karyotypes of the 9 *L. quebecensis* genome strains.

The type strain was previously cited as LL11\_022T.

Overall the *L. quebecensis* strains harbor highly conserved karyotypes with some variation seen in the largest chromosome.

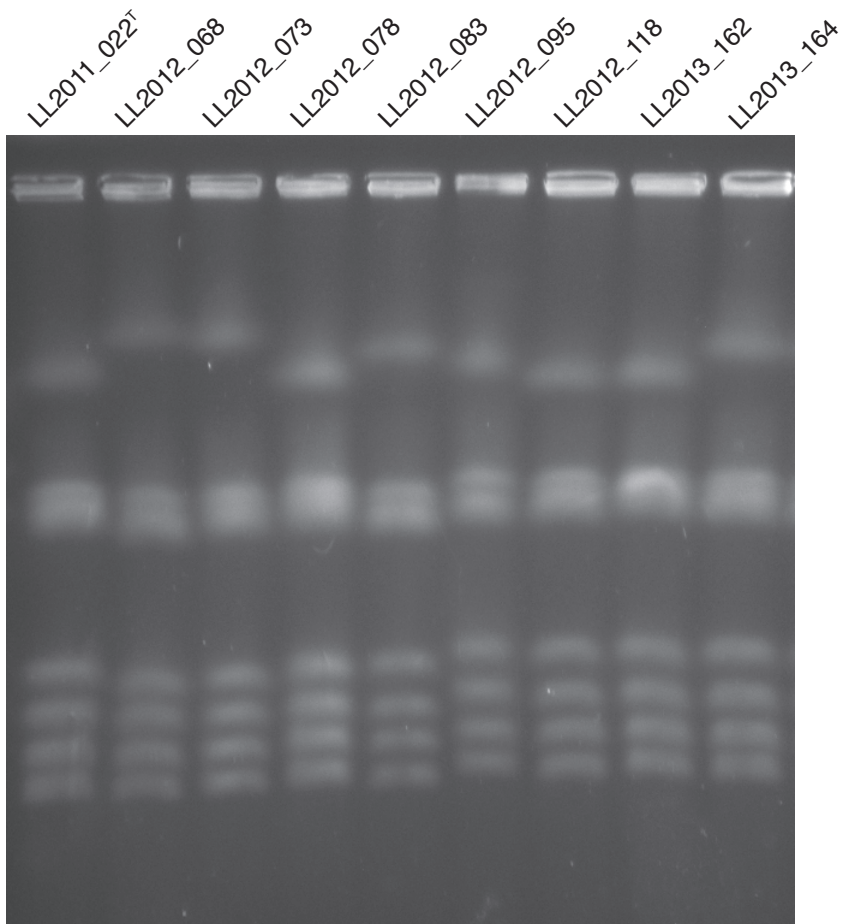

## Figure S2.

Phenotypic diversity among the 9 *L. quebecensis* strains on 21 media types.

(A) Heatmap of the 9 strains were grown in 21 different media types including multiple carbon sources as well as other compounds that induced stress on various cellular functions.

(B) A PCA analysis of the 9 *L. quebecensis* isolates analyzed.

A

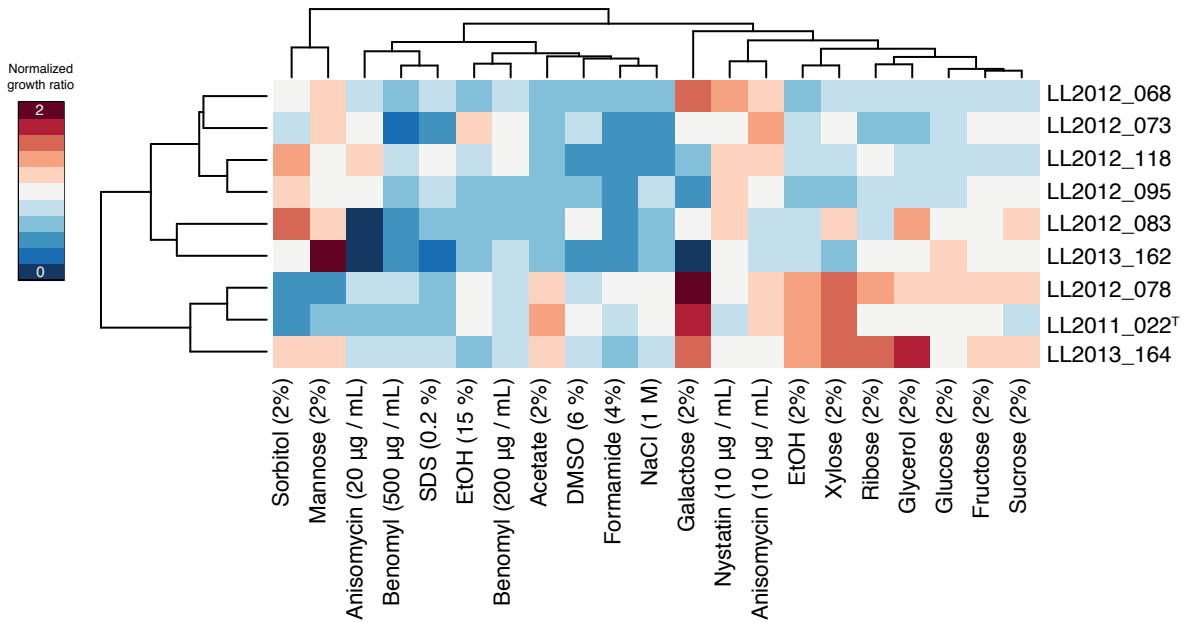

B

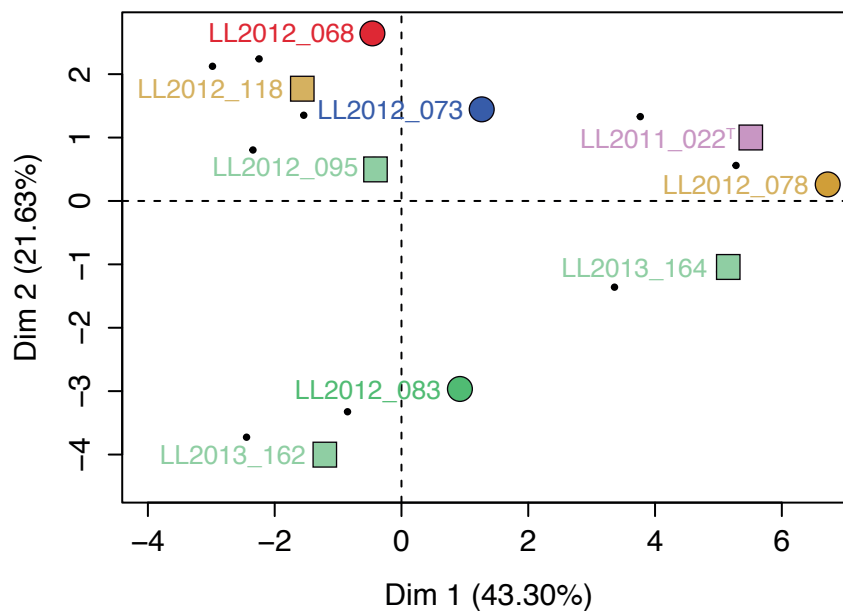

Supplement: supp_evv262_SuppFig.pdf [file supp_evv262_SuppFig.pdf]
